# Supplementary material for: Exploring disease interrelationships in patients with lymphatic disorders: A single center retrospective experience
Source: PubMed Central journal article supplement (PMC9028099; doi:10.1002/ctm2.760), 2022-04-22
Supplement: CTM2-12-e760-s004.pdf [file CTM2-12-e760-s004.pdf]

# Supplementary Figure 1

a

Control

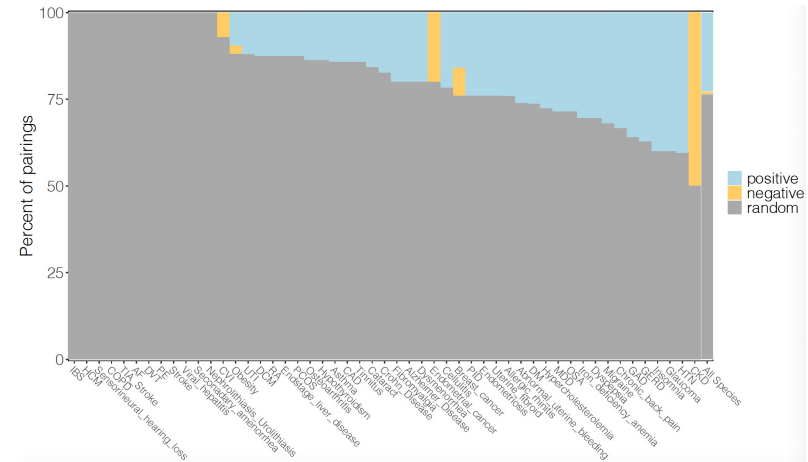

b

Lymphatic

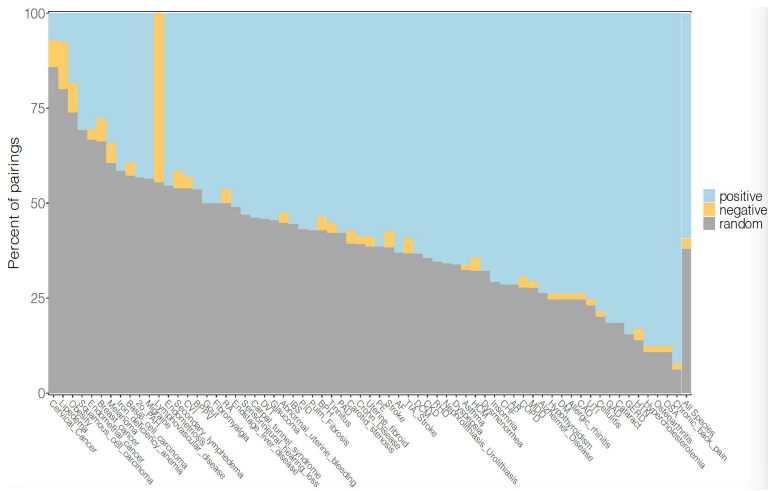

c

Secondary lymphedema

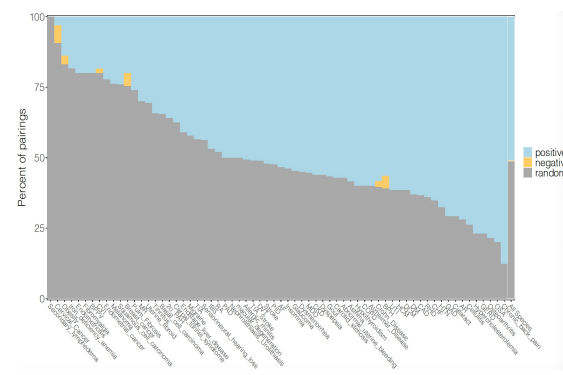

d

Lipedema

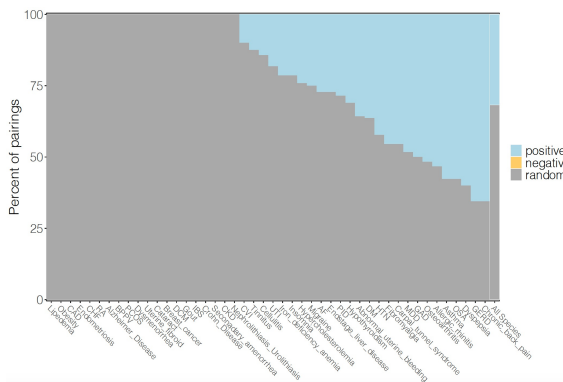

e

Lymphovascular

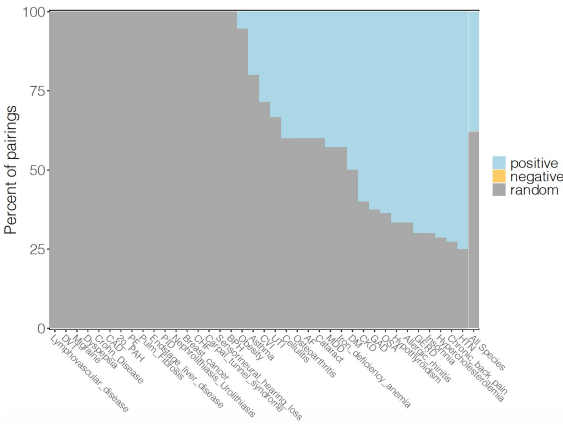

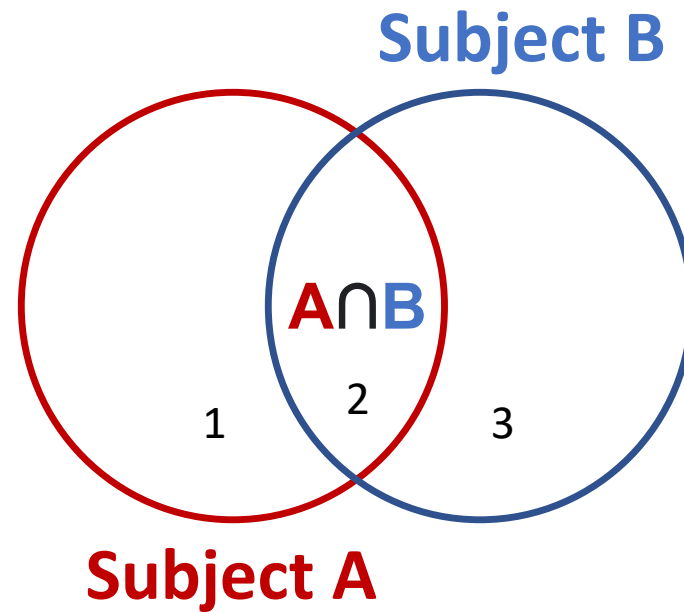

$$\text{Jaccard Distance (A,B)} = 1 - \frac{\text{Number of comorbidities found in both Subject A and Subject B (2)}}{\text{Total number of comorbidities found in either Subject A or Subject B (1+2+3)}}$$

# Supplementary Figure 3

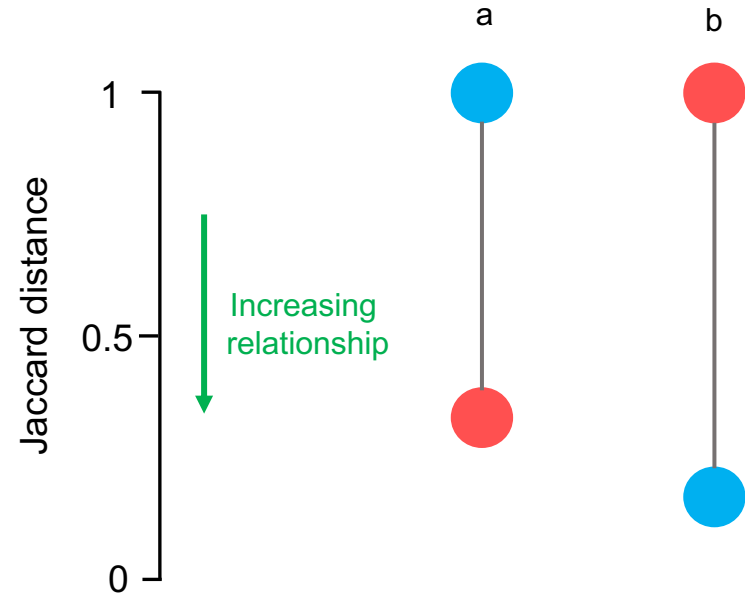

**a:** A disease pair that does not show co-occurrence in control group (blue circle, Jaccard distance=1), but this same disease pair shows co-occurrence in the lymphatic group (red circle).

**b:** A disease pair that does not show co-occurrence in lymphatic group (red circle, Jaccard distance=1), but this same disease pair shows co-occurrence in the control group (blue circle).
